# Fruit bromelain derived peptides destabilize growth of amyloid fibrils

Sromona Das<sup>1,2</sup>, Sangita Dutta<sup>2</sup>, Ramesh K Paidi<sup>3</sup>, Subhas C Biswas<sup>3</sup>, Umesh C Halder<sup>1\*</sup> and Debasish Bhattacharyya<sup>2,4\*</sup>

<sup>1</sup> Department of Chemistry, Jadavpur University,  
188, Raja S.C. Mallick Road, Jadavpur, Kolkata -700 032, India

<sup>2</sup>Division of Structural Biology and Bioinformatics

<sup>3</sup>Division of Cell Biology and Physiology

CSIR-Indian Institute of Chemical Biology,

4, Raja S.C. Mallick Road, Jadavpur, Kolkata -700 032, India

<sup>4</sup>National Institute of Pharmaceutical Education and Research, Kolkata, India.

\*Corresponding author      Email: [dbhattacharyya1957@gmail.com](mailto:dbhattacharyya1957@gmail.com)  
Phone: + 91 94 33 56 00 04  
Present address: Adjunct Faculty  
National Institute of Pharmaceutical Education and Research,  
Kolkata, India.  
Email: [uchalder@chemistry.jdvu.ac.in](mailto:uchalder@chemistry.jdvu.ac.in), [uhalder2002@yahoo.com](mailto:uhalder2002@yahoo.com)  
Phone: + 91 94 33 48 76 22

Type of Manuscript:      Regular research article  
Running title:              Destabilising amyloid fibrils by bromelain peptides  
Key words:                  Aggregation; amyloid-beta; amyloid fibrils; digested bromelain peptides; destabilisation.

34 **ABSTRACT**

35  $\beta$ -Amyloid deposition as fibrillar plaques in brain is the primary cause of Alzheimer's disease.  
36 We report potency of cysteine protease 'fruit bromelain' from pineapple in destabilising A $\beta$   
37 fibrils. Bromelain peptide pool (Mw<500 Da) obtained mimicking human alimentary tract  
38 digestion inhibited fibrillation from monomeric and oligomeric states of A $\beta$  and irreversibly  
39 dissociated preformed fibrils into small oligomers of varied sizes. Time kinetics was followed by  
40 Thioflavin-T assay and microscopic imaging. Synthetic bromelain peptides corresponding to A $\beta$   
41 sticky region found using ClustalW analysis revealed specificity of peptides in destabilisation of  
42 amyloidal structures. Spectra of different molecular states of A $\beta$  obtained from application of 8-  
43 anilino-1-naphthalenesulfonic acid, circular dichroism and Fourier-Transformed Infrared  
44 spectroscopy collectively indicated interaction dependent structural change. Probable mechanism  
45 for fibril dissociation was thus predicted. Peptides relieved A $\beta$  cytotoxicity on pheochromcytoma  
46 cells and dissociated plaques in AD-type rats prepared by bilateral intracerebroventricular  
47 administration of A $\beta$  in rat brain cortex. Pineapple being a phytochemical, its efficiency to  
48 disaggregate amyloid bodies warrant further investigation.

49 **GRAPHICAL ABSTRACT**

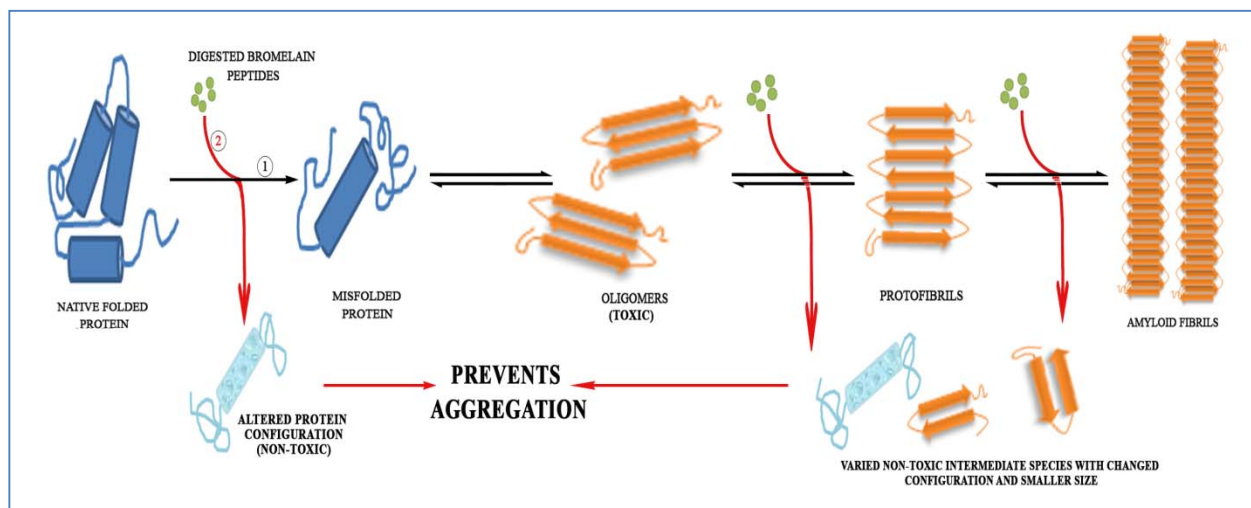

50

## 51 INTRODUCTION

52 The occurrence of dementia has increased to one individual every 3 seconds, with 50 million  
53 affected people in 2018 and according to World Alzheimer's Report, this will almost double  
54 every 20 years, reaching 82 million in 2030 and 131.5 million in 2050. Alzheimer's disease  
55 (AD), the most widely studied and common form of dementia, accounts to 60–80% cases and is  
56 the sixth leading cause of death in USA [1]. Casual factors for AD though known for a very  
57 small 1-2% of the total population, it is still unknown for majority of cases. Though several  
58 factors, such as the ApoE4 genotype and polymorphism in several genetic loci have been  
59 identified alongside type2 diabetes, brain injury, stroke, diet and other environmental factors,  
60 aging stands as the first risk factor.

61 AD is an age-related progressive, neurodegenerative disorder characterized by gradual  
62 memory loss, cognitive abilities, characteristic neuropathological amyloid plaque depositions,  
63 formation of neurofibrillary tangles and severe neuronal loss in diverse regions of brain cortex  
64 [2]. A characteristic hallmark includes irreversible brain degeneration in elderly people. The  
65 amyloid deposits and senile plaques mainly contain insoluble, aggregated proteins, the main  
66 constituent being  $\beta$ -amyloid (A $\beta$ 42), derived from a 170 kDa cellular amyloid precursor protein  
67 (APP) [3, 4]. Several lines of evidence suggest a pathogenic role for A $\beta$  assembly in progression  
68 of AD, and increasing evidences point specifically towards soluble protofibrillar intermediates as  
69 a pathogenic species [5]. Thus, there is considerable interest in studying the structures and  
70 assembly mechanisms of proteins into amyloid structures and their precursors. Consequently,  
71 though there is more than one stage that can be targeted, preventing aggregation is the primary  
72 therapeutic target.

73 Several pioneering work has led to the possibility of generating small and soluble  
74 oligomeric forms of A $\beta$  *in vitro* [6] and these oligomers have proved detrimental on binding to  
75 synaptic neurons [7]. AD, a multifaceted disease involves multiple cellular changes, including  
76 synaptic and neuronal loss, activation of microglia and astrocytes, mitochondrial damage, and  
77 tau phosphorylation. Thus, various therapeutic strategies have been developed based on these  
78 modifications but no certain cure is available till date and is also nevertheless dose-dependent.  
79 Further, there are no available biomarkers that can relate symptoms of AD in individuals.

80 Physical exercise and healthy diets, few of the best remedies targeted towards good  
81 health decelerates growth of AD in elderly people, thereby aiding memory and learning skills in  
82 early AD patients and individuals having low cognitive impairment [8]. Natural products, a  
83 major component of healthy diets have multiple health benefits, including anti-inflammatory,  
84 antioxidant, anti-arthritis, neuroprotective and memory cognitive functions [9]. Many well  
85 known natural products and herbs currently include green tea,  $\beta$  carotene, vitamins E and C,  
86 rosemary, curcumin, ginseng, sage and many others [8, 9]. Concentrating specifically on natural  
87 products and targeting small molecules, we studied protective effects of pineapple extract  
88 derived enzyme, bromelain against  $A\beta$  induced toxicities in AD pathogenesis.

89 Bromelain, the cysteine protease from pineapple has broad specificity. It hydrolyzes  
90 diverse substrates like native and partly denatured collagen, elastin, casein, fibrin, hemoglobin  
91 etc. It offers a wide range of therapeutic efficacies and due to its efficiency after oral  
92 administration, safety and lack of undesired side effects; bromelain is being increasingly  
93 accepted as a phytotherapeutical drug [10]. In this perspective, investigation was carried out to  
94 verify whether bromelain derived peptides could destabilize preformed  $A\beta$  aggregates. As a first  
95 step towards understanding interactions between fruit bromelain derived peptide pool and  $A\beta$   
96 aggregate, we described effect of bromelain on preformed  $A\beta$  aggregates *in vitro*. Although  
97 structural information available for  $A\beta$  complexes is sparse, this analysis is likely to reveal  
98 features relevant to  $A\beta$  binding and generate initial hypotheses highlighting effect of peptide  
99 pool on  $A\beta$  aggregate. Earlier reports show that inactive and autodigested fruit bromelain act as a  
100 kinetic/nucleation inhibitor of amyloid formation in human insulin [11].

101 In this study, amyloid aggregates were reconstituted *in vitro* in a controllable manner and  
102 anti-amyloidogenic effect of bromelain peptide as an early quick battery test was performed  
103 before cellular and animal studies. The work described that fruit bromelain derived peptides,  
104 obtained from extensive digestion by various proteases found in human gastrointestinal tract,  
105 have an anti-aggregation property and can permeate the blood brain barrier (BBB) with respect  
106 to its small size. Further, three methods have been used to understand the effect in preventing  
107 formation of aggregates from (i) monomers, (ii) oligomers and also (iii) disaggregation of  
108 preformed  $A\beta$  fibrils. The self-assembling evaluation of  $A\beta$  *in vitro* will provide an opportunity  
109 to screen molecules for anti-amyloidogenic property of therapeutic significance for new AD drug  
110 discovery.

## 111 **EXPERIMENTAL SECTION**

### 112 **Materials**

113 Fine chemicals were procured as follows: Thioflavin T (Th T) from Acros Organics, Belgium; 8-  
114 anilino-1-naphthalene sulfonic acid (ANS), 1,1,1,3,3,3-Hexafluoroisopropanol (HFIP) and  
115 Paraformaldehyde (PFA) from Sigma–Aldrich, St. Louis, Missouri, USA; Dimethyl sulfoxide  
116 (DMSO) from HiMedia Laboratories, Mumbai, India; trypsin (3x crystallized, bovine pancreas),  
117 carboxypeptidase (bovine pancreas, type II - PMSF treated aqueous suspension),  $\alpha$ -chymotrypsin  
118 (hog pancreas), elastase (porcine pancreas) and pepsin from SRL, Mumbai, India; acetic acid,  
119 formic acid, Acetonitrile (ACN) and Trifluoroacetic acid (TFA) from Merck, Germany; urethane  
120 from AMRESCO, Texas, USA; uranyl acetate from BDH Corporation, Mumbai, India; copper  
121 grids (300-mesh size) and mica sheets (size 20620 MM, 0.27 - 0.33 mm thickness) from Electron  
122 Microscopy Sciences, Pennsylvania, USA; MTT from Molecular Probes, Invitrogen, USA;  
123 Dulbecco's Modified Eagle's Medium (DMEM), penicillin-streptomycin, trypsin-EDTA and  
124 Fetal Bovine Serum (FBS) from Gibco, Maryland, USA. HPLC-purified peptides A $\beta$ 40/42 were  
125 procured from American Peptide, Sunnyvale, CA, USA. Physical and chemical homogeneity of  
126 monomeric A $\beta$  peptide was verified by mass spectrometric analysis where other than trace  
127 amount of dimer, trimer and tetramer of the peptide, no other impurities could be detected.

### 128 **Preparation of A $\beta$ 40/42 oligomers and fibrils**

129 A $\beta$ 40/42 oligomers and fibrils were prepared following Barghorn et al., 2005 [12]. Briefly,  
130 lyophilized A $\beta$  peptide was reconstituted in 100% HFIP to a concentration of 1 mM. HFIP was  
131 removed by evaporation in a Speed Vac and then resuspended to 5 mM in anhydrous DMSO.  
132 This stock served as monomeric A $\beta$  and was stored at -80°C. The stock was diluted to 400  $\mu$ M  
133 with Phosphate Buffer Saline (PBS) containing 0.2% SDS and incubated at 37°C to form  
134 oligomeric intermediates. A further dilution with PBS to 100  $\mu$ M and incubation at 37°C for 96  
135 hr – 7 day formed amyloid structures having increased level of crosslinks.

### 136 **Preparation of fruit bromelain**

137 Fresh ripe pineapple (100 g) was cut into small portions, smashed by a household grinder and  
138 centrifuged at 10,000 rpm for 15 min at 4°C to separate fibrous materials from edible portion.  
139 The lyophilized supernatant was reconstituted in 10 mM Na-phosphate, pH 7.5, and centrifuged  
140 as stated. The clear supernatant (2 ml) was passed through Sephadex G-50 column (1.5  $\times$  90 cm)

141 pre-equilibrated with the same buffer at 25°C. Flow rate was maintained at 12 ml/hr. Fractions  
142 collected were followed at 280 nm and assayed for proteolytic activity using azocasein as  
143 substrate [13]. Proteolytic activity of bromelain was confined to the first peak fraction while the  
144 second contained pigments, salts and small peptides. Active fractions were pooled and dialyzed  
145 against 1 mM Na-phosphate, pH 7.5 and lyophilized. All spectrophotometric measurements were  
146 taken in Specord 200 spectrophotometer (Analytik Jena, Germany). Bromelain concentration  
147 was measured using  $\epsilon_{280\text{nm}}^{1\%} = 2.01$  [14]. This preparation is a mixture of bromelain isoforms  
148 and minor amount of other cysteine proteases of similar molecular weight [15].

### 149 **Peptides derived from fruit bromelain under conditions of human digestive system**

150 The fruit bromelain protein pool (10 mg) was dissolved in 2 ml of 5% HCOOH to obtain an  
151 acidic solution (pH 2.0) followed by addition of Pepsin (2 mg, 1:50 wt/wt) and incubation at  
152 37°C for 3 - 4 hr. Thereafter,  $\text{NH}_4\text{HCO}_3$  was added to increase pH of the solution to 7.5. Trypsin  
153 and chymotrypsin (2 mg each, 1:50 wt/wt) were sequentially added along with trace amount of  
154 elastase and carboxypeptidase for further digestion at 37°C for 7 - 8 hr. Incubation conditions  
155 were maintained mimicking human gastrointestinal tract digestion.

### 156 **Separation of bromelain peptides by Sep-Pak C18 Cartridges**

157 Fruit Bromelain derived peptide pool was separated from undigested protein part by using  
158 Waters C18 Sep-Pak Cartridges. Prior to use, cartridges were washed with 10 ml acetonitrile and  
159 equilibrated with water containing 0.1% TFA. After sample loading, unabsorbed proteins and  
160 large peptides were eluted and cartridge washed with water containing 1% TFA. Peptide pool  
161 was eluted with 2 ml 50% acetonitrile containing 0.1% TFA. MS analysis revealed presence of  
162 peptides ranging from 200 Da to >1 kDa. For further fractionation according to size, the pool (2  
163 ml) was applied to Sephadex G-10 column (85 ml, fractionation range <700 Da) fitted with Bio-  
164 logic duo flow instrument (Bio-Rad) at a flow rate of 6 ml/hr. Fractions eluted were continuously  
165 monitored at 220/280 nm in a UV visible spectrophotometer, collected according to peak  
166 positions and further characterized by MS analysis.

### 167 **Fluorometric quantification of amyloid aggregates**

168 Th-T assay was employed to follow aggregation kinetics of A $\beta$ . Th-T, a fluorescent dye interacts  
169 with  $\beta$ -sheet rich fibrils leading to characteristic increase in fluorescence intensity in the vicinity

170 of 480 nm, relative to unbound Th-T (ex: 450 nm; em: 460-600 nm).  $\lambda_{\max}$  emission intensity  
171 varies from 480 to 487 nm [16]. A Hitachi F4500 fluorescence spectrometer attached to a  
172 circulating water bath at 25 °C was used (ex/em slit widths 5/5 nm). A stock solution of Th-T (250  
173  $\mu\text{M}$  in water) was made using  $\epsilon_{412\text{ nm}} = 35,000\text{ M}^{-1}\text{cm}^{-1}$  and aliquots of 10  $\mu\text{l}$  were transferred to  
174 the reaction mixture before fluorescence measurements were recorded. The reaction mixture  
175 consisted of 10 mM Na phosphate, pH 7.5 and 1-10 mM peptide solution in a final volume of 1  
176 ml. Blank correction was done for all ( $n = 5$ , with replicates of 5 in each set).

### 177 **Determination of Protein and peptide concentration**

178 While bromelain peptide concentration was determined optically using molar extinction  
179 coefficient of peptide bond at  $\epsilon_{214\text{ nm}} = 923\text{ M}^{-1}\text{cm}^{-1}$  in presence of acetonitrile and formic acid  
180 [17], concentration of A $\beta$  was evaluated using  $\epsilon_{276\text{ nm}} = 1450\text{ M}^{-1}\text{cm}^{-1}$  [18].

### 181 **Mass spectrometry analysis**

182 Molecular mass of peptide pool was determined using a Q-ToF Mass Spectrometer (Waters  
183 Corporation, USA). The sample was desalted using Zip-Tip  $\mu\text{-C}_{18}$  (Millipore, Billerica, MA,  
184 US). Matrix bound samples were eluted in 50% acetonitrile in water containing 0.01% formic  
185 acid. Samples were further analyzed under positive mode of ESI at desolvation temperatures of  
186 100-125°C. Argon as a collision gas at 2 kg/cm<sup>2</sup> having collision energy of 10 eV was applied.  
187 Micro channel plate detectors were used.

### 188 **Dynamic Light Scattering (DLS)**

189 DLS monitors change in particle size and distribution, and calculates average hydrodynamic  
190 radius during protein/peptide aggregation. DLS measurements of different A $\beta$  species in  
191 presence and absence of bromelain derived peptides were taken using a back-scatter apparatus  
192 (Malvern Nano ZS, Malvern) having a constant scattering angle of 90°, at 25  $\pm$  1°C [19].  
193 Samples were diluted to a final concentration of 0.1 mg/ml in a total volume of 1 ml ( $n = 5$ , with  
194 replicates of 5 in each set).

### 195 **Transmission Electron Microscope (TEM)**

196 Samples were placed on a 300-mesh copper grid covered by carbon-coated film and incubated  
197 for 10 min at 25°C. The excess fluid was removed and grids were negatively stained for 30 sec  
198 with 10  $\mu\text{L}$  of 1% uranyl acetate solution. Excess stain was removed by repeated washing with



199 Milli-Q water and samples were visualized in a TECNAI G2 TEM (Thermo Fischer Scientific,  
200 USA) operating at 120 kV accelerating voltage and 1,15,000x. To estimate widths of individual  
201 fibres, digital electron micrographs were analyzed by MCID Elite (Micro Computing Imaging  
202 Device 7.0, revision 1.0, Imaging Research, Inc.).

### 203 **Atomic Force Microscopy (AFM) Imaging**

204 Protein samples (10  $\mu$ l, 200 ng/ml) were deposited onto freshly cleaved mica sheets and air-dried  
205 for 20 min. Sometimes the sample was gently washed with 0.5 ml Milli-Q water to remove  
206 molecules that were not firmly attached to the mica and then air-dried as above. Acoustic AC  
207 (AAC) mode AFM was performed using a Pico plus 5500 AFM (Agilent Technologies, USA)  
208 with a piezoscanner maximum range of 9  $\mu$ m. The cantilever resonance frequency was 150 - 300  
209 kHz.

210 Cells were seeded on glass cover slips maintaining a density of  $10^6$  cells/well in a 6-well  
211 plate and treated with media containing 5  $\mu$ M of A $\beta$ 40/42 at 0 hr with or without 5  $\mu$ M of  
212 synthetic peptides, after preincubation for 24 hr. The same media volume was added to control  
213 cultures. Cells were incubated for an additional period of 48 hr at 37°C and allowed to reach 70–  
214 80% confluency. Cover slips with adherent cells were then washed with 1X PBS to completely  
215 remove media, followed by fixation with 1% PFA for 1 hr at 4°C. Prior to imaging PFA was  
216 rinsed well with 1X PBS and finally with double-distilled water to prevent deposition of any  
217 excess buffer molecule. Imaging was done in dry mode using 100 micron scanner. Cantilevers of  
218 450  $\mu$ m length with a nominal spring force constant of 0.2 N/m were used. Resonance frequency  
219 was set at 13 kHz. Individual plots shown for surface topography of various samples are  
220 representative views of morphologies observed for multiple areas of the samples.

221 In both sets, images (512 by 512 pixels) were processed using Pico scan software  
222 (Molecular Imaging Corporation, San Diego, CA).

### 223 **Disaggregation of amyloid protein by bromelain derived peptides**

224 The following experiments were designed to evaluate anti amyloidogenic property of protease  
225 digested small peptide pool of fruit bromelain using three-phase study protocol [20]: (i) freshly  
226 prepared A $\beta$ 40 was co-incubated with digested peptide (7  $\mu$ M) for 96 hr. Aliquots were  
227 withdrawn at 0, 6, 20, 72 and 96 hr; (ii) Oligomers of A $\beta$ 40 were formed from freshly prepared  
228 monomeric peptide upon incubation for 20 hr. Thereafter, aggregation was followed in presence



229 and absence of bromelain derived peptides up to 96 hr. Aliquots were taken at 20, 36, 48, 72 and  
230 96 hr post initiation of oligomerization and, (iii) Matured A $\beta$ 40/42 fibrils were formed after  
231 incubation of monomeric peptide for 96 hr. Thereafter, bromelain derived peptides were added  
232 and disaggregation of fibrils was monitored for 48 hr. In all sets, samples were analyzed by Th T  
233 assay and TEM or AFM images. Peptide solutions without aggregates served as control for  
234 fluorescence measurements (n = 5, with replicates of 5 in each set).

### 235 **Conformational studies**

236 *Interactions with ANS*– ANS, an extrinsic fluorescent probe interacts nonspecifically with  
237 surface hydrophobic patches of proteins resulting in significant increase of quantum yield [21].  
238 Emission intensity of A $\beta$  (100  $\mu$ M) was followed in presence of 0 – 500 mM of ANS in 10 mM  
239 Na-phosphate, pH 7.5 (ex: 380 nm; em: 400–550 nm; em<sub>max</sub>: 470 nm). Spectral corrections with  
240 ANS as control were done for all sets.

241 *Fourier-Transform Infrared (FT-IR) Spectroscopy*– FT-IR spectra were recorded in a Tensor 27  
242 FT spectrometer equipped with a liquid N<sub>2</sub>-cooled mercury cadmium telluride detector. For each  
243 spectrum, water vapor used as blank was subtracted for baseline correction. Spectra were  
244 obtained using Bruker, Opus Software and scans were taken between 1,590 and 1,710 cm<sup>-1</sup> and  
245 normalized to unity.

246 *Circular Dichroism (CD) spectroscopy* - CD spectra of A $\beta$  (30 ng/ml) were analysed using a  
247 Jasco J-815 spectropolarimeter (JASCO International, Japan). A cell having 0.1 mm optical path  
248 length and a bandwidth of 1 nm was used. Solvent spectra were subtracted from the measured  
249 spectra in each experimental set. All spectra were recorded in the far UV range of 195 – 250 nm  
250 at 25°C considering an average of ten scans. Spectral analysis was done with Origin Lab 8.0  
251 software.

252 For all sets n = 5, with replicates of 5 in each set were maintained.

### 253 **Ex-vivo studies**

254 *Cell culture*– PC12 cells were purchased from American Tissue Type Collection (ATCC),  
255 Virginia, USA. Cells were cultured in DMEM containing 10% FBS and 1X penicillin and  
256 streptomycin mixture at 37°C in a humidified incubator having 5% CO<sub>2</sub> environment. Cells were  
257 seeded and allowed to reach 80 – 85% confluency before performing experiments. Five

258 experimental sets were maintained: (1) untreated cells; (2) cells incubated with A $\beta$  peptide (10  
259  $\mu$ M final concentration) for 24 hr; (3) cells treated with bromelain peptide (25  $\mu$ M final  
260 concentration) for 48 hr; (4) cells treated with A $\beta$  for 24 hr followed by bromelain for 48 hr and  
261 (5) cells co-incubated with A $\beta$  and bromelain for 48 hr. Around  $10^5$  cells/100  $\mu$ l of medium/well  
262 were maintained in a 96 well polystyrene plate. Cell viability was quantified for all sets using 3-  
263 (4,5-dimethylthiazol-2-yl)-2,5-diphenyltetrazolium bromide (MTT) assay after the incubation  
264 period.

265 *Cell viability test (MTT assay)* - Mitochondrial respiration, an indicator of cell viability, was  
266 assessed in experimental sets (n = 4), using the mitochondrial dependent reduction of MTT to  
267 formazan [22]. MTT (10  $\mu$ l from a stock of 5 mg/ml in PBS was added to each well and  
268 incubated for 4 hr at 37°C. The medium was then aspirated and replaced by 100  $\mu$ l of DMSO,  
269 following which plates were agitated at 25°C for 10 min and absorbance recorded at 590 nm by a  
270 multi well plate reader (Biotek–Epoch; Biotech Instruments, Winooski, VT, USA). The average  
271 absorbance value of replicate wells was considered for each set. In these experiments, cells  
272 without test samples but MTT served as positive control (blank) while cells treated with  
273 hydrogen peroxide (10  $\mu$ l) served as negative control.

#### 274 **In vivo studies**

275 *Experimental Animals*- Adult male Sprague-Dawley rats weighing 280 - 330 g were procured  
276 from the random bred colony of the animal care facility of the institute (ICB) and were  
277 maintained following good husbandry conditions at standard temperature ( $24 \pm 4^\circ\text{C}$ ), humidity  
278 ( $60 \pm 5\%$ ) and 12 hr light-dark diurnal cycles. They were provided with food and water *ad*  
279 *libitum*. All animal experiments were carried out as per guidelines of Institutional Animal Ethics  
280 Committee for the Purpose of Control and Supervision of Experimentation on Animals  
281 (CPCSEA), under the Division of Animal Welfare of the Ministry of Environments, Forests &  
282 Climate Change, Government of India.

283 *Brain Stereotaxic Surgery*- Rats were anesthetized intraperitoneally with pentobarbital (50 mg/kg  
284 i.p.; Thiosol, Neon Laboratories Limited, Mumbai, India). Animals were fixed in a stereotaxic  
285 apparatus (Stoelting, MO, USA) according to Paxinos and Watson (1998) with the incision bar  
286 kept 3.5 mm below the interaural line and their body temperature maintained at 37°C [23]. We

287 initially compared various doses of both A $\beta$  and bromelain to analyse the dose dependency of  
288 bilateral intracerebroventricular (ICV) infusion of both in our hands, and thereby optimize the  
289 dose (A $\beta$ , 6  $\mu$ M/ rat and bromelain, 20  $\mu$ M/ rat) for developing animal model in our laboratory.  
290 The stereotaxic coordinates used were: Lateral = 0.12 cm, Anterio-posterior = -0.90 cm and  
291 Dorsoventral = 0.34 cm, with reference to Bregma point following the Rat Brain Atlas of  
292 Paxinos and Watson [24]. In the control group, artificial Cerebrospinal fluid (aCSF) (147 mM  
293 NaCl; 2.9 mM KCl; 1.6 mM MgCl<sub>2</sub>; 1.7 mM CaCl<sub>2</sub> and 2.2 mM dextrose) was infused ICV (3  
294  $\mu$ L into each side). All infusions were done bilaterally with each hemisphere at a time in a total  
295 volume of 12  $\mu$ L (6  $\mu$ L/side) at a flow rate of 0.5  $\mu$ L/min. The infusion probe was left in position  
296 for an additional five minutes after each drug delivery for proper diffusion of drug into the  
297 ventricles. Proper postoperative care, including hand-held feeding was provided until animals  
298 recovered completely.

299 Experimental sets comprised of animals treated with: (1) A $\beta$ , (2) bromelain, (3) A $\beta$  followed  
300 by bromelain after 21 days and (4) A $\beta$ +bromelain simultaneously. On the respective day of  
301 sacrifice (21 days post infusion of A $\beta$  and 14 days post infusion of bromelain), the rats were  
302 anaesthetized with urethane and transcardially perfused with 1X PBS (pH 7.2) followed by 4%  
303 paraformaldehyde in PBS for 5 min each,. The brains were removed under perfusion conditions  
304 and fixed overnight in PBS containing 4% paraformaldehyde and subsequently transferred into  
305 30% sucrose in PBS after 48 hr to allow cryoprotection.

## 306 **Histology**

307 Brain samples stored in PBS–30% sucrose solution was investigated later by tissue  
308 histopathology using hematoxylin-eosin staining. Slides were prepared following usual H&E  
309 staining post parafilm block preparation and tissue sectioning using manual microtome machine  
310 (Leica RM2235 Manual Rotary Microtome for Routine Sectioning). Histological analysis of  
311 wound tissue samples was carried out with an Olympus SZX 10.

## 312 **Statistical analyses**

313 All experimental results have been reported as mean  $\pm$  SEM. Student's t-test was performed in  
314 each case to evaluate significant difference between means and has been represented as p values.  
315 Number of replicates performed for each experiment has been mentioned in the respective  
316 sections.

317 **RESULTS**

318 **Destabilization of A $\beta$  amyloid by bromelain derived peptides**

319 Preliminary experiments with proteolytically active ‘fruit bromelain’ indicated that the enzyme

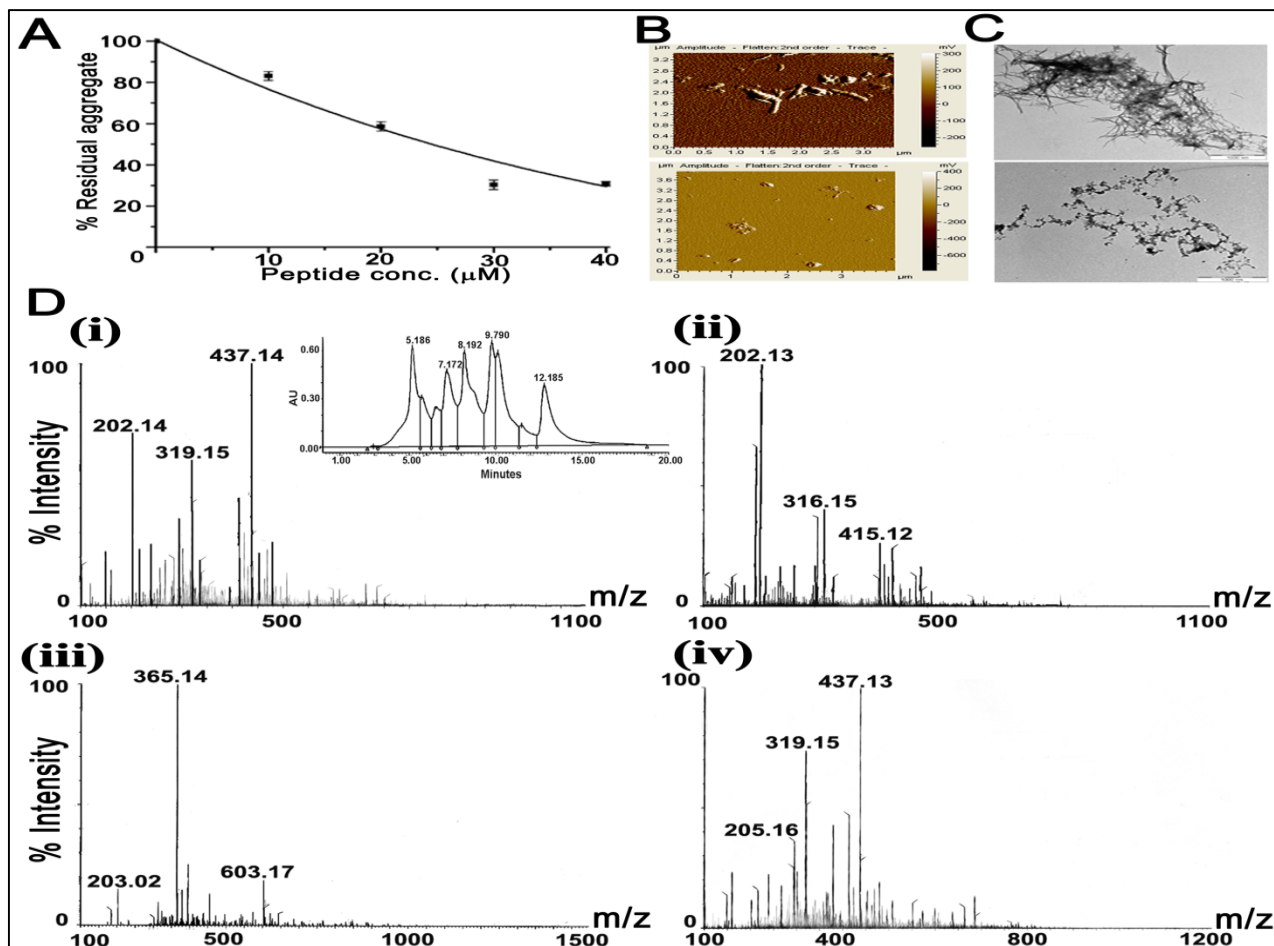

**Fig. 1: Destabilization of preformed A $\beta$ 40 aggregates and ESI mass analysis of different fractions of peptides.** (A) Dependency of destabilization of A $\beta$  40 aggregates on concentration of peptides. Residual structure was measured by Thioflavin-T assay. (B) AFM image of the preformed A $\beta$ 40 aggregate of 72 hr (upper panel) and the disaggregated state (lower panel). (C) Corresponding TEM images have been shown in (upper panel) and (lower panel). Experimental conditions have been described in the text. (D) Fruit bromelain was treated with digestive enzymes and the peptide pool was separated using Sephadex G-10 size exclusion column. The peak fractions corresponding to retention times (R<sub>t</sub>) 5.186, 7.172, 8.192 and 9.790 min were analyzed by ESI-MS (i-iv). Being in the desalting zone, the last chromatographic fraction of R<sub>t</sub> = 12.185 min was not analyzed. The HPLC profile has

320 was capable of destabilizing preformed A $\beta$ 40/42 fibrillar structures to small oligomers. This was  
321 also observed using inactive or proteolytically degraded ‘fruit bromelain’ or even synthetic

322 peptides using specific template of ‘fruit bromelain’ sequence. Therefore the underlying  
323 mechanisms might be proteolysis or interaction between amyloid structures and specific amino  
324 acid stretches of fruit bromelain or a combination thereof. Mass spectrometric analysis of  
325 dissociated products of A $\beta$  amyloid never revealed any fragment smaller than the monomeric A $\beta$   
326 peptide.

327 The pool of eluted peptides were capable of disaggregating preformed A $\beta$ 40 (10  $\mu$ M) in a  
328 concentration dependent manner (0 - 40  $\mu$ M) as suggested from ThT assay. Under experimental  
329 conditions, approximately 70% of disaggregation was achieved after 24 hr of incubation (Fig.  
330 1A). AFM images demonstrated dense fibrillar structure of pretreated A $\beta$  amyloid aggregates  
331 (Fig. 1B, upper panel, left) while they followed course of degradation in presence of bromelain  
332 peptides (Fig. 1B, lower panel, left). During imaging, the skeleton of fibril though visible, at  
333 places the connections were loose. Fibril structure of  $\beta$ -amyloid aggregate was degraded by  
334 peptide pool, compared to matured fibrils of control sample. Corresponding TEM micrographs  
335 showed that fibrillar network was composed of rod-like structures of variable length and  
336 diameter that were fragmented to small spherical oligomers to monomer like molecules (Fig. 1C,  
337 upper and lower panels). As a negative control, it was ensured from both AFM and TEM that the  
338 fibrillar structure was stable under conditions of incubation with peptides for 24 hr. Encouraged  
339 by this observation, peptides of Mw <500 Da were isolated from bromelain digest as they may  
340 enter into the blood stream, Mw being one of the precondition to cross BBB.

#### 341 **Isolation of bromelain derived peptides of Mw <500 Da**

342 SE-HPLC profile of peptide pool generated from freshly prepared pineapple after human  
343 protease digestion (Fig. S-1A) revealed unresolved overlapping broad peak. 15% SDS-PAGE  
344 indicated diffused band around 10 kDa (Fig. S-1B). Corresponding MALDI-MS analysis also  
345 deciphered mixture of undigested protein part and digested polypeptides ranging from 1000–  
346 5000 Da (Fig. S-1C). Most of these polypeptides were >700 Da, the molecular mass limit for a  
347 substance to cross BBB [25]. The viability of peptide-based aggregation mediator is determined  
348 by its ability to cross BBB and withstand *in vivo* conditions leading to mediator degradation.  
349 Low molecular weights are needed for crossing BBB and the transport must also be done without  
350 any degradation of aggregation mediator [26].

351 The chromatogram from Sephadex G -10 indicated presence of more than 10 components  
352 (Fig 1D). The Mw of the 4 trailing fractions were verified by MS analysis (Fig. 1D, marked as

353 (i) – (iv) Inset). Except one peptide of Mw 603.17, Mw of all major peptides of these 4 fractions  
 354 were <500 Da (200- 437 Da) (Fig. 1D). These fractions were pooled as stock solution for  
 355 subsequent experiments. Fractions eluting ahead of Fraction I with Mw >500 Da were excluded.

356 **Destabilization of A $\beta$  40 aggregate by digested bromelain derived small peptides of Mw**  
 357 **<500 Da**

358 *Th T assay* - Disassembly of preformed A $\beta$ 40 fibrils by peptide pool was both concentration and  
 359 time dependent. With increasing peptide concentration from 0 – 40  $\mu$ M keeping

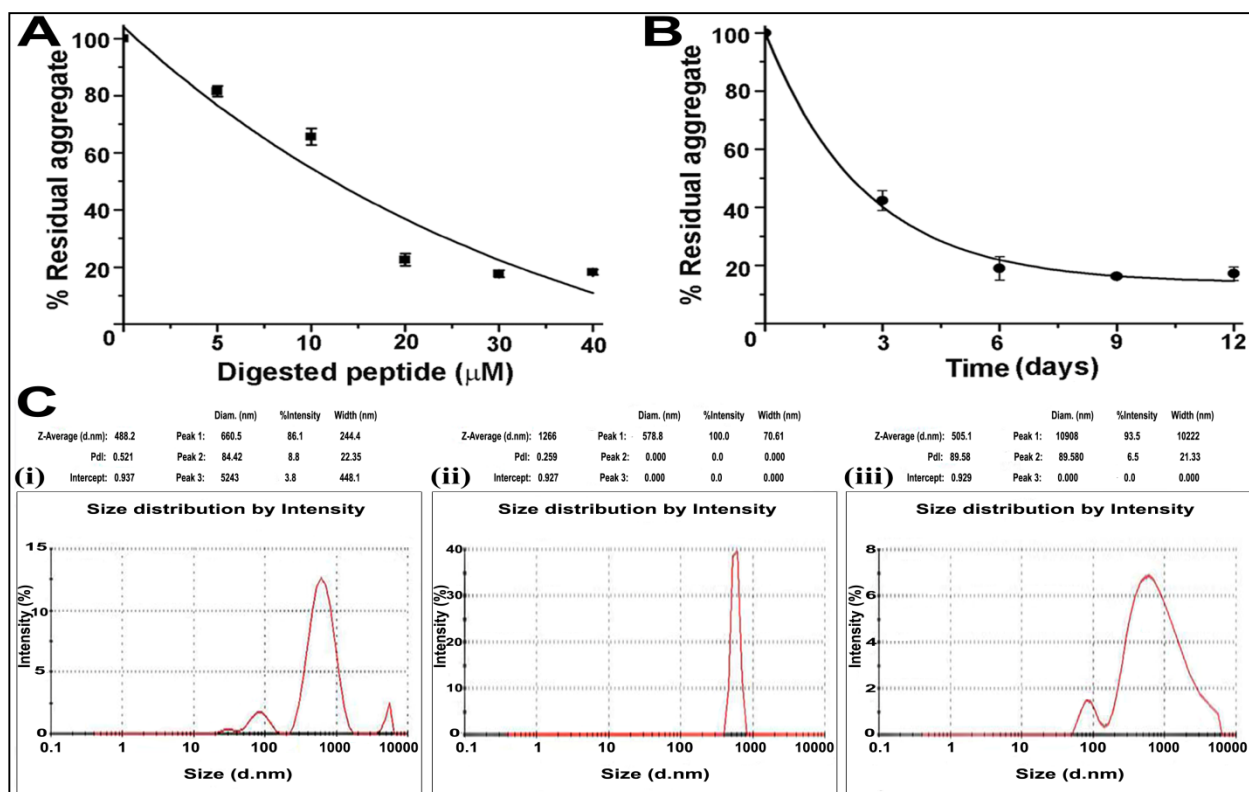

360

**Fig. 2: Destabilization of A $\beta$ 40 aggregate and analysis of hydrodynamic radius of different forms of A $\beta$ 40.** Dependency of disaggregation on (A) the concentration of pool of digested peptides (1-40  $\mu$ M) in 48 hr and (B) time using 7  $\mu$ M of the peptide pool as measured by Th-T fluorometric analysis. (C) DLS measurements of (i) Monomeric A $\beta$ 40, (ii) A $\beta$ 40 fibrils and (iii) preformed A $\beta$ 40 aggregates after incubation in the presence of fruit bromelain peptides after 48 hr of incubation at 37°C.

361 duration of incubation and temperature at 24 hr and 37°C respectively, aggregates exponentially  
 362 destabilized having a residual structure of around 20% (Fig. 2A). Similarly, increasing  
 363 incubation time from 0–12 days keeping peptide concentration and temperature at 7  $\mu$ M and  
 364



365 37°C respectively, an exponential time course having 85% disaggregation was observed (Fig.  
366 2B).

367 *DLS* - DLS profiles of monomeric, aggregated and disaggregated states of A $\beta$  showed actual  
368 particle distribution according to size in diameter avoiding stability factors against shearing  
369 forces (Fig. 2C). Average diameter of particles present in these sets were 488.2 nm, 1266 nm,  
370 509.1 nm for monomer, aggregate and disaggregate respectively as observed within scale of  
371 detection. In case of aggregated state, majority of the particles were out of scale and could not be  
372 detected. The correlogram coefficient data of DLS shows the time at which the correlation starts  
373 to significantly decay as an indication of mean size of the sample. Further, high monodispersity  
374 of a sample is a measure of how steep the line is and conversely, polydispersity of the sample is  
375 indicated by how extended the decay takes (figure not shown). These features were in good  
376 agreement with DLS profiles (Fig. 2C). Th-T and DLS analysis preliminary indicate A $\beta$   
377 disaggregation potency of peptide pool.

### 378 **Inhibition of A $\beta$ 40 aggregate formation by digested peptide pool**

379 *Digested peptide pool inhibits A $\beta$ 40 aggregate formation from monomers* - Time course of A $\beta$ 40  
380 aggregate formation in presence and absence of bromelain peptides was followed for 96 hr. TEM  
381 images revealed that even at 0 hr, monomeric A $\beta$  40 was contaminated with trace amounts of  
382 very small multimeric components. Samples represented in Fig. 3A are electron micrographs  
383 reveal clear time dependent aggregation kinetics at 0, 6, 20, 72 and 96 hr time intervals. While  
384 oligomerisation was noticed after first 20 hr, aggregates were visible roughly around 48 hr  
385 onwards. But in the presence of digested peptide, there were no aggregates even up to 96 hr  
386 indicating total abolition of aggregation formation. All three phases of A $\beta$ 40 aggregation kinetics  
387 was monitored through Th-T fluorescence at same time intervals (0 - 96 hr) (Fig. 3C) exhibiting  
388 a sigmoidal curve showing static fluorescence intensity up to 20 hr, indicating lag period  
389 represented by presence of monomers and small oligomers. After which, there was an  
390 intermediate phase from where larger oligomers and other intermediate forms might have formed  
391 till 48 hr followed by the last saturation phase where, fully matured fibrils are formed thereafter,  
392 where Th-T fluorescence became static. In presence of digested peptide, this sigmoidal pattern of  
393 A $\beta$ 40 aggregation kinetics was disturbed, and showed only a lag phase with monomers or small  
394 oligomers only. This has been supported by AFM images (Fig. S-2A).



395 *Digested peptide pool inhibits A $\beta$ 40 aggregate formation from oligomers* - Fig. 3D shows Th-T  
396 fluorescence data of A $\beta$ 40 in the presence and absence of digested peptide pool from the  
397 oligomeric stage onwards at 20, 36, 48, 72 and 96 hr time intervals. Th-T fluorescence increased  
398 from 20 to 96 hr indicating formation of fibrils from oligomers stage on contrast to a significant  
399 decrease in the intensity profile in presence of peptides, indicating inhibitory effect on oligomers  
400 even after aggregation continued up to 20 hr. These results were further confirmed by TEM (Fig.  
401 3B) and AFM images (Fig. S-2B).

402 *Digested peptide pool disaggregated preformed A $\beta$ 40 fibrils* - Under defined conditions of self-  
403 aggregation, A $\beta$ 40 was incubated and aliquots withdrawn for TEM imaging. The sample after 96  
404 hr of incubation showed an extensive network of branched fibrillar structures having high degree  
405 of cross-links. With increase of incubation period up to 7 days, overlapping fibrillar structures  
406 became denser and more matured with heavy branching. In either set, no trace of oligomeric  
407 components could be detected. (Fig. 3E upper panel). When these samples were separately  
408 treated with bromelain peptides for 7 days at 37<sup>0</sup>C, dense fibrillar structures completely  
409 dissociated into small oligomers and further down to monomer or dimer that remained  
410 undetected by TEM. Very small pieces of broken fibrillar structures were visible in the 7 days  
411 sample as compared to 96 hr (Fig. 3E lower panel). Samples were also treated with Th-T to  
412 estimate presence of aggregated structures. Assuming that the emission intensity of the self-  
413 aggregated sample after 7 days was 100%, the 96 hr incubation sample offered nearly 95%  
414 emission suggesting complete aggregation. In either set, disaggregated fibrils offered nearly 20%  
415 of emission intensity. Considering that A $\beta$ 40 in its monomeric condition at 0 hr shows nearly  
416 10% emission, Th-T assay indicates that disaggregation was nearly complete in each set (Fig.  
417 3F).

#### 418 **Disassembly of pre-formed A $\beta$ 42 fibrils by digested bromelain peptides**

419 The potency of A $\beta$ 42 to form amyloid aggregate is higher than A $\beta$ 40 and therefore, is clinically  
420 more important. Though the 'sticky' hydrophobic regions of the two peptides (15 - 21) are  
421 identical, presence of two additional residues at C-terminal end of A $\beta$ 42 renders it more toxic  
422 [27]. TEM image of A $\beta$ 42 monomers showed presence of trace amount of small oligomers as  
423 physical impurity (Fig. 3H(i)). The monomer on self-aggregation for 7 days under defined  
424 conditions exhibited dense overlapping fibrillar network with extensive branching where  
425 oligomers remained undetected (Fig. 3H(ii)). Preformed A $\beta$ 42 fibrils when treated with

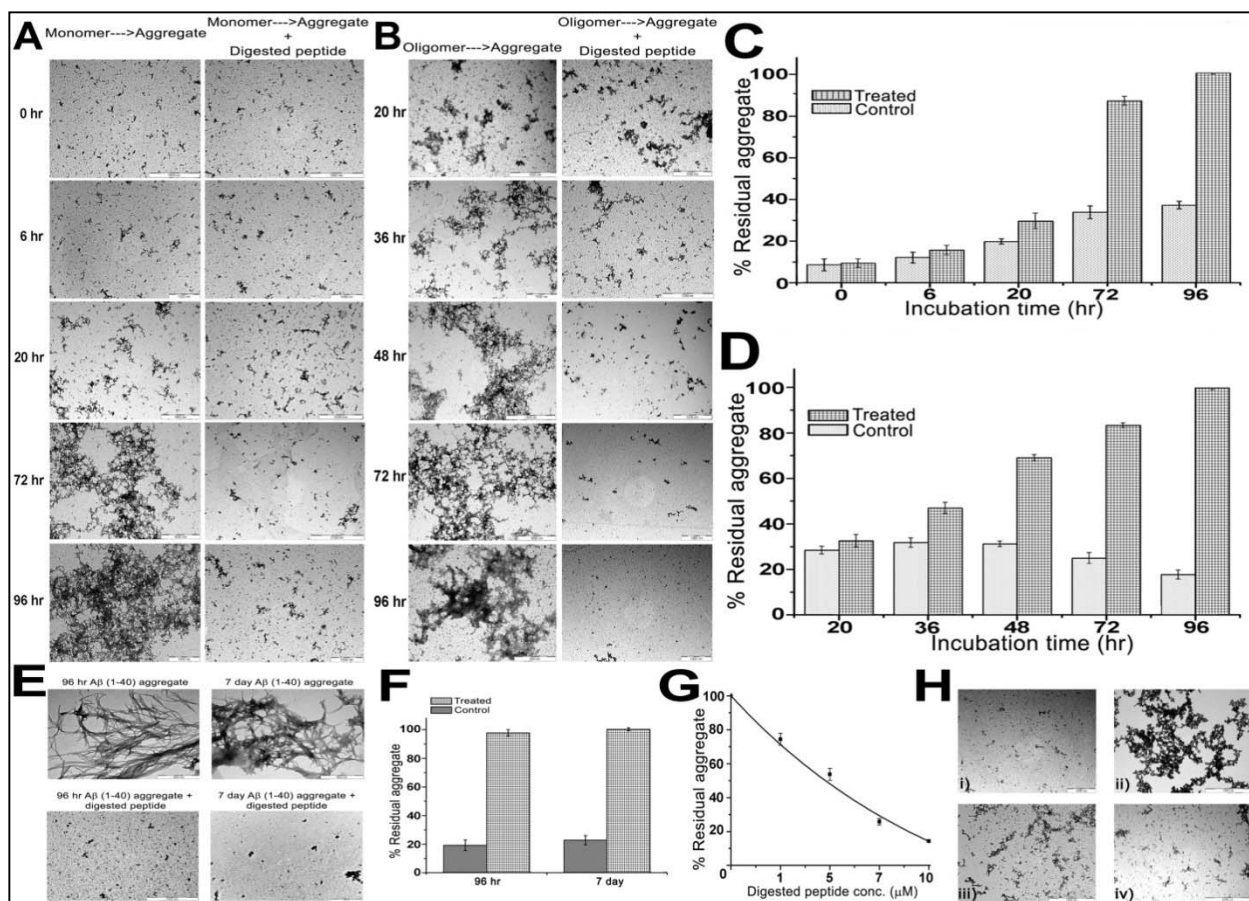

426

**Fig. 3: Aggregation kinetics of Aβ40/42 fibrils.** (A) Monomer to aggregate: Aβ40 was incubated in absence (left panel) and presence (right panel) of 7 μM digested peptide at 37°C. (B) Oligomer to aggregate: Oligomers were generated after incubating Aβ40 for 20 hr under fibrillating conditions were incubated under similar conditions as in A. Aliquots were withdrawn at time intervals as indicated vertically. Corresponding Th graphs of A and B have been depicted in C and D respectively. In both panels, emission intensity of the sets at 96 hr was considered as 100% (See also Fig. S2). (E) TEM images: (Upper panel) Aβ40 incubated under defined conditions of fibrillation for 96 hr and 7 days. (Lower panel) Corresponding sets after incubation with peptide pool for 7 days. (F) Th T assay of the four samples presented in E where absence and presence of the peptides have been denoted as control and treated. Intensity of the control sample after 7 days has been considered as 100%. (G) Estimation of concentration of peptide pool as measured from Th T assay during disaggregation. Fluorescence from spontaneously formed aggregates after 7 day was considered as 100%. (H) TEM images of (i) monomeric Aβ42, (ii) monomeric Aβ42 fibrillation for 96 hr at 37°C; (iii) fibrillation as seen in presence of peptide pool for 48 hr and (iv) protease digested peptide pool, inhibiting Aβ42 aggregation.

427

428

bromelain peptides, defibrillated completely within 7 days. At an intermediate time course of 4

429 days, dissociation of network structure was observed with generation of varied oligomers where  
430 links between large oligomers were either nonexistent or very feeble (Fig. 3H(iii)). With passage  
431 of time, moderately large oligomers reduced in size and links between them were abolished (Fig.  
432 3H (iv)). Defibrillization was dependent on peptide concentration (0 - 10  $\mu$ M) holding all other  
433 experimental conditions constant as observed from Th-T. Acknowledging limitations of Th-T  
434 and interference from monomeric A $\beta$ 42 peptides, it may be stated that bromelain peptides (10  
435  $\mu$ M) can efficiently dissociate preformed A $\beta$ 42 fibrils into small oligomers (Fig. 3G).

### 436 **Change in secondary and tertiary structures**

437 To have an insight of the molecular structure of A $\beta$ 40 peptides during the course of aggregation  
438 and disaggregation, interaction with the fluorophore 8-ANS sensing hydrophobic patches of  
439 anchoring proteins, FT-IR and CD spectroscopy were applied. Four states of A $\beta$ 40 were  
440 characterized; the monomeric state, self-aggregated state where fibrillar structure was formed by  
441 7 days, the same incubate in presence of bromelain peptides where aggregation was inhibited and  
442 disaggregated state from preformed fibrils after interaction with bromelain peptides.

443 *Interaction with ANS* – Interaction of aforementioned states of A $\beta$ 40 with 0 - 300  $\mu$ M ANS was  
444 followed. It showed significant and comparable interactions with monomeric, aggregation  
445 inhibited and disaggregated states where the interaction with aggregated state was greatly  
446 reduced. In all sets, emission intensity reached plateau level between 450 – 500  $\mu$ M of ANS  
447 indicating saturation of ligand binding. Considering emission intensity of disaggregated state as  
448 100%, relative emissions from monomeric, aggregation inhibited and aggregated states were  
449 95.54, 90.27 and 45.99 % respectively (Fig. 4A). This profile also shows that structures of the  
450 three sample sets constituting monomer and small oligomers were similar but not identical so far  
451 their interactions with ANS was concerned. A simplified explanation for low ANS binding with  
452 aggregated state is that hydrophobic stretches of constituent molecules were no more available.  
453 To ensure that low affinity of ANS with aggregated state did not arise from an artifact, time  
454 course of aggregate formation was followed in presence of 500  $\mu$ M of ANS up to 96 hr. During  
455 this period, reduction of emission intensity followed an exponential pattern leading to 64% while  
456 considering the emission at 0 hr as 100%. (Fig. 4B). The dissociation constant ( $K_d$ ) of the  
457 conjugate has been calculated to be 11.171  $\mu$ M.

458 *FT-IR* – Change in protein secondary structure could be detected from FT-IR spectra within 1800  
459 – 1600  $\text{cm}^{-1}$ . While bands in the range of 1648 – 1657  $\text{cm}^{-1}$  are assigned for  $\alpha$ -helix, those  
460 between 1623 – 1641  $\text{cm}^{-1}$  and 1674 – 1695  $\text{cm}^{-1}$  are assigned for high frequency  $\beta$ -sheet

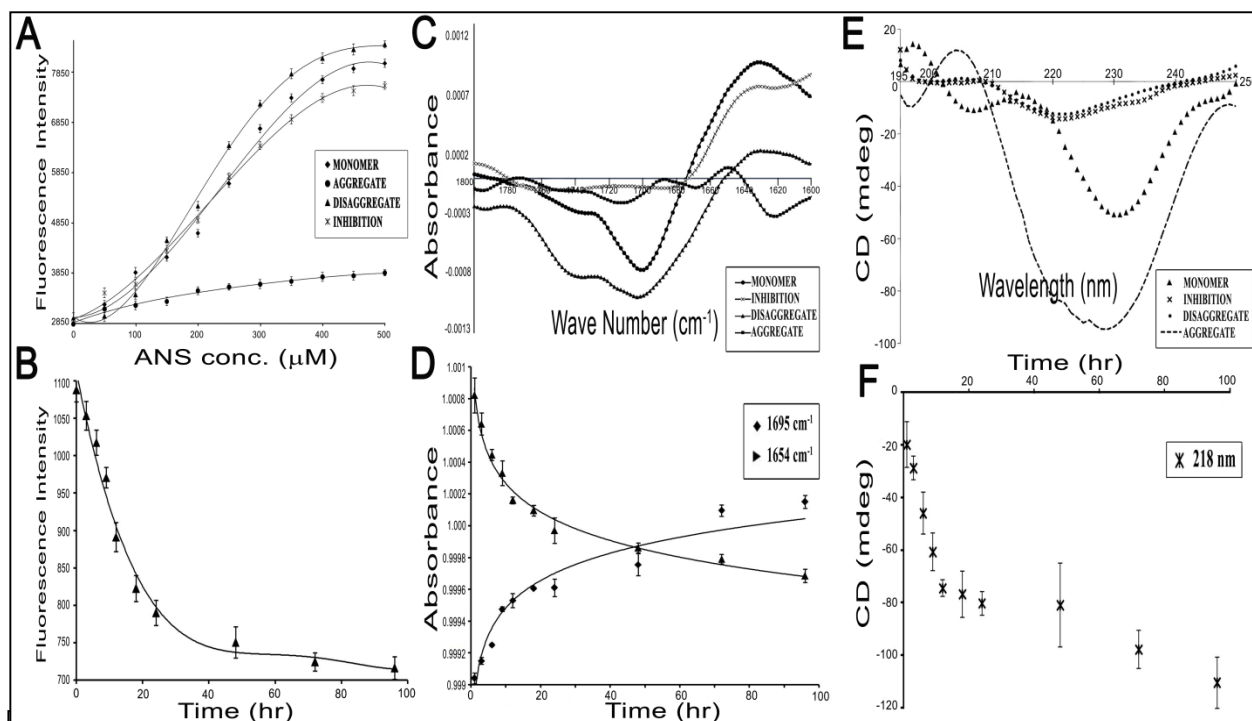

**Fig. 4: Spectroscopic analysis of different forms of A $\beta$ 40.** (A) Concentration dependency of ANS interaction as observed from fluorescence emission intensities. (B) Interaction of ANS (500  $\mu\text{M}$ ) as followed with different species of A $\beta$  during the time course of aggregation. (C) FT-IR spectra ranging from 1800-1600  $\text{cm}^{-1}$  for different species of A $\beta$ . (D) Change of secondary structure of A $\beta$ 40 during fibrilization was followed at 1695  $\text{cm}^{-1}$  and 1654  $\text{cm}^{-1}$ . (E) Far UV CD spectra (195–250 nm) of these states and (F) Time course of aggregate formation from monomeric state as observed from ellipticity values at 218 nm. Each spectral value is the average of 5 runs and in all sets, buffer corrections have been done. The descriptions of the notations have been provided in respective insets. All experimental conditions have been mentioned in details in the text.

461 components. Since rotational-vibrational spectra of proteins are very sensitive to their electronic  
462 environment, no single wave number could be assigned to these protein structures [28]. FT-IR  
463 spectra of monomeric, aggregated and disaggregated A $\beta$ 40 peptide and the inhibited form were  
464 scanned in along 1590 – 1710  $\text{cm}^{-1}$ . Significant differences of spectra and therefore structures  
465 were predicted (Fig. 4C). While correlating these results with structure, significant loss of  
466 residual  $\alpha$ -helices and gain of  $\beta$ -sheet structure of monomeric A $\beta$ 40 during aggregate formation

467 was observed between 0 - 96 hr at  $1654\text{ cm}^{-1}$  and  $1695\text{ cm}^{-1}$  respectively [29] (Fig. 4D). FT-IR  
468 results though semi-quantitative, characteristic features of protein aggregate formation were  
469 evident.

470 CD - Far-UV CD spectra of aforementioned states between 195 - 250 nm showed distinct change  
471 of secondary structures (Fig. 4E).  $\beta$ -sheet content of monomeric peptide was calculated to be  
472 24% that was comparable to 27% as reported [30]. This minor difference is expected to arise  
473 from solvent composition initially used to solubilize the peptide. An increase of negative  
474 ellipticity of aggregated state was evident indicating rigidity of structure. The disaggregated state  
475 and the peptide resisting aggregation showed similar low ellipticities in the whole spectral range  
476 indicating generation of distinctly different conformers and prevalence of random coil structures.  
477 To follow formation of aggregated state from monomers through oligomeric states, change of  
478 ellipticity was followed for 96 hr at 218 nm. A continuous decrease of negative ellipticity was  
479 indicative of  $\beta$ -sheet formation, a characteristic feature of amyloid-like structures. The decrease  
480 appeared to be continuous as fibrillar structures require longer time for maturation (Fig. 4F). It is  
481 noteworthy that the disaggregated state and monomer that inhibits aggregate formation had very  
482 similar random coil rich structures.

### 483 **Sequence alignments of fruit bromelain and A $\beta$ peptide using ClustalW2**

484 Amino acid sequence of fruit bromelain constituting 351 amino acids (UniProtKB-O23791) and  
485 A $\beta$ 40/42 were aligned using ClustalW2 (multiple sequence alignment) software (Fig. 5A).  
486 Previous studies reported  $^{16}\text{KLVFFAE}^{22}$  of A $\beta$ 40/42 as the most aggregate prone zone of the  
487 peptide that forms the core of aggregate from which fibrils propagate [31]. Reports assign  
488 tryptophan as a potent residue for A $\beta$  fibrillation and plaque formation [32]. Alignment of  
489 sequences of fruit bromelain and A $\beta$ 40/42 peptides showed significant degree of homology  
490 around the aggregate prone zone of A $\beta$  peptide. Alignment of fruit bromelain to Phenylalanine  
491 rich sequence KLVFFAE of A $\beta$ 40 [Clustal W 2.0] and analyses of peptides generated after  
492 gastrointestinal digestion deciphered [ExPASy Peptide Cutter] probable bromelain peptides as  
493 TIIGY and GQD. In vitro experiments conducted with these peptides indicated specificity of  
494 small bromelain peptides in disaggregation as visualized from microscopic images (Fig. 5B) and  
495 was hence further used for *in-vivo* and *ex-vivo* analyses.



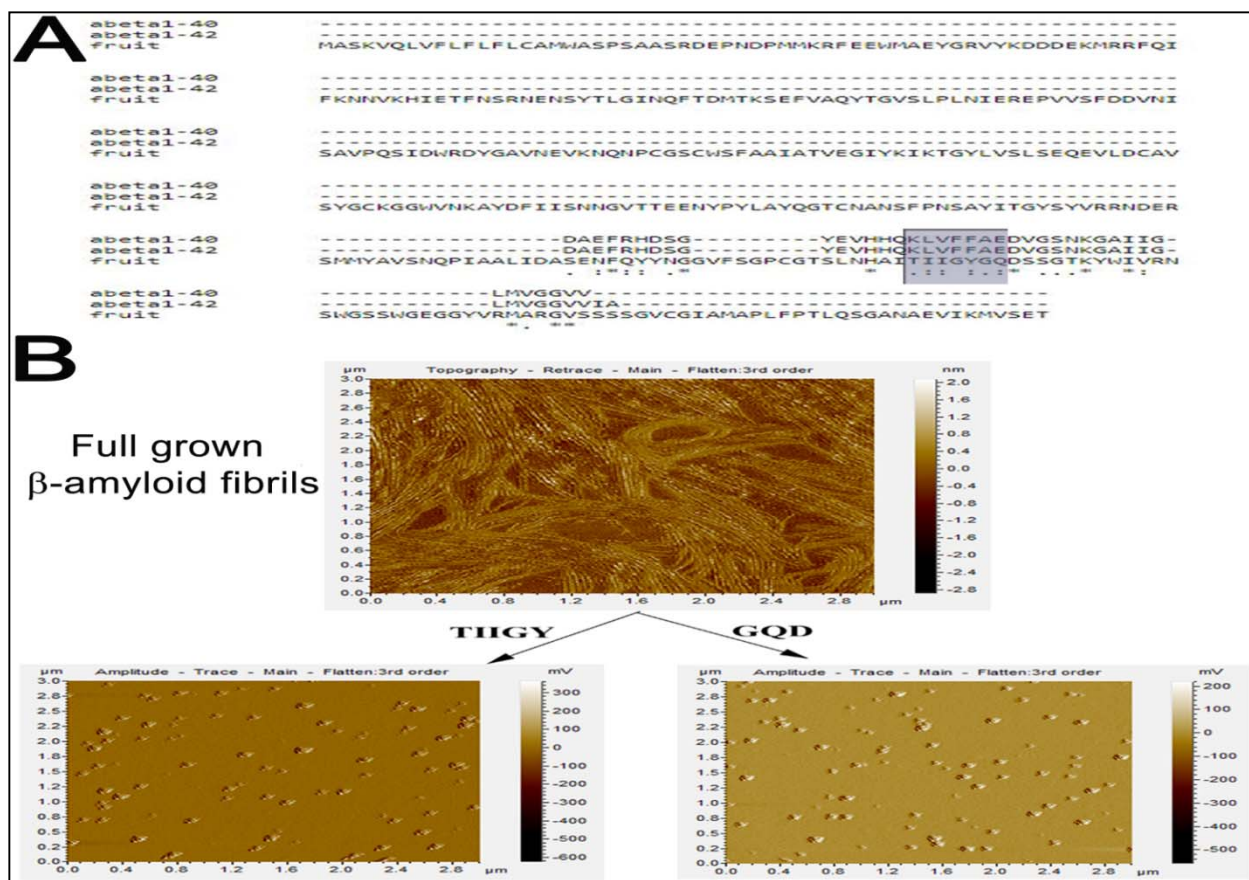

**Fig. 5: Determination of small peptides corresponding to  $A\beta$**  (A) Sequence alignment of fruit bromelain with  $A\beta_{40/42}$  using ClustalW2 software. The aggregation prone region of  $A\beta_{40/42}$  (KLVFFAE, residues 16-22) has been highlighted to denote the corresponding region in fruit bromelain. Two peptides (TIIGY and GQD) corresponding to the highlighted region of fruit bromelain were considered for further studies. The symbols ‘\*’, ‘:’ and ‘.’ indicate identical, highly similar and similar residues respectively. (B) AFM images of preformed  $A\beta_{40}$  fibrillar structure (upper panel) and as obtained after incubation for 96 hr with the synthetic peptides TIIGY (lower left panel) and GQD (lower right panel).

496

## 497 Cellular Studies

498 *Cell viability assay* - Based on positive responses of *in vitro* experiments, viability of PC12 cells  
 499 was checked based on dose dependency to optimize  $A\beta$  and bromelain peptide concentrations  
 500 suited non-toxic to cells. The measured cytotoxicity increased significantly with increasing  
 501 concentrations of  $A\beta_{40}$  within the range of 20  $\mu$ M – 20 mM. An optimum concentration of 7

502 mM was optimized for further experiments. This concentration though higher than physiological  
503 conditions was maintained to enhance rate of reaction within experimental timeframe (Fig. 6).

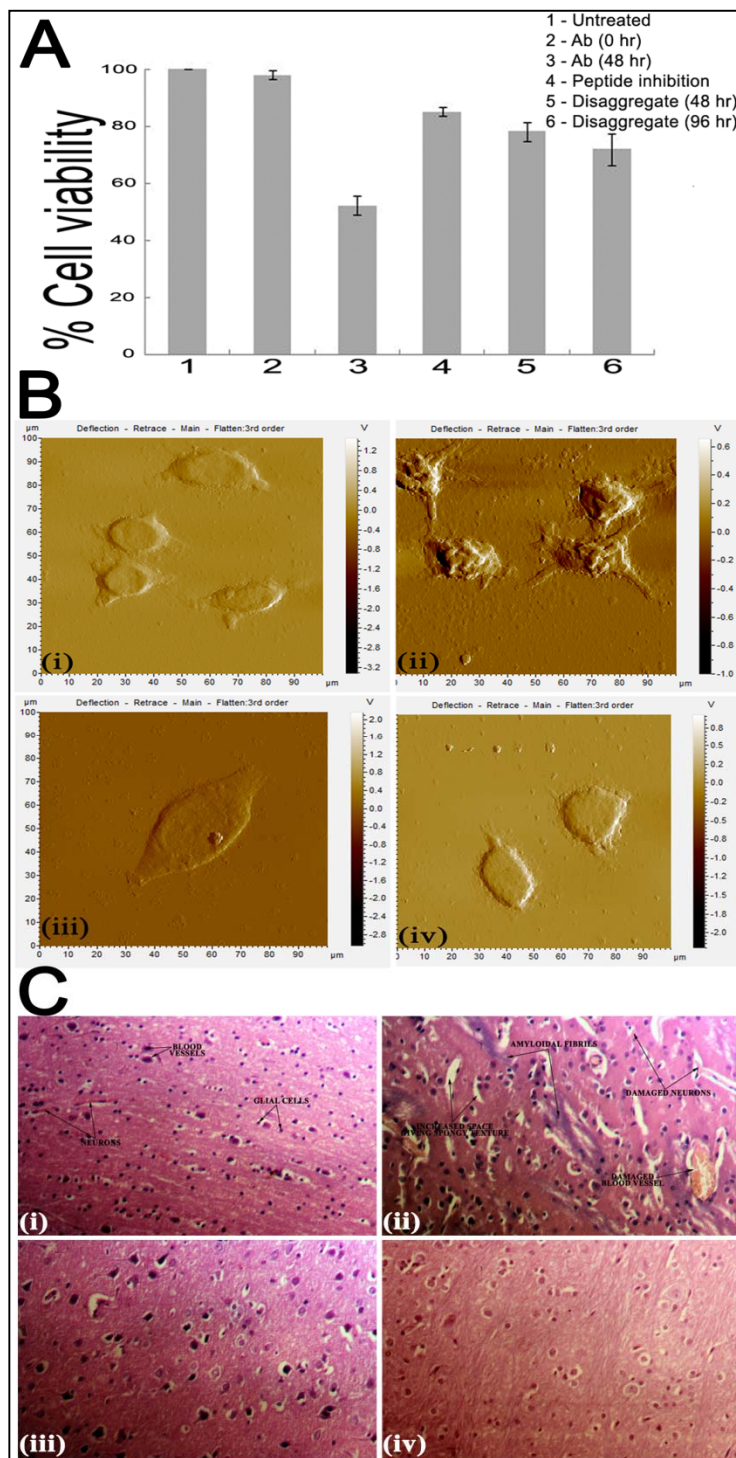

**Fig. 6: Ex-vivo and in-vivo**

**toxicity studies of Aβ40 (A):**

Inhibition of Aβ40 induced cytotoxicity by bromelain derived peptides on PC12 cells as observed from MTT assay. Viability of cells has been presented with respect to untreated cells as 100%. All results have been presented after blank corrections where no cell was added. Added reagents have been mentioned in the inset. (B) AFM images of PC12 cells, (i) untreated cells, (ii) cells after 48 hr of Aβ40 treatment. (iii) cells as of (ii) after an additional incubation of 48 hr with bromelain derived peptides and (iv) cells were treated with Aβ40 and peptides. (C) Histological H & E stained section of rat brain tissue obtained from stereotaxic experiments of (i) untreated (control) (ii) Aβ treated; (iii) Aβ treated rats infused with bromelain peptides after aggregation was standardized and (iv) rats treated simultaneously with Aβ and bromelain derived peptides.

504  
505 Viability of untreated cells in DMEM medium at 0 and 48 hr of incubation was  
506 indistinguishable as quantified by MTT assay and was considered as 100%. Viability of cells



507 after treatment with A $\beta$  at 0 and 48 hr was  $99.01 \pm 1.5\%$  and  $52.23 \pm 3.4\%$  respectively (Fig. 6A,  
508 lanes 1, 2 and 3). Cells when co-incubated with A $\beta$  and bromelain peptides for 48 hr, exhibited  
509 viability of  $85.04 \pm 1.5\%$  [lane 4], when treated with peptides following A $\beta$  deposition exhibited  
510  $78.21 \pm 3.3\%$  and  $71.91 \pm 5.6\%$  viability after 48 and 96 hr respectively. On the contrary, cells  
511 left for an extended period of 2 - 3 days with A $\beta$  without bromelain peptide treatment gradually  
512 lost viability and died. Considering the stress pre-imposed on cells by A $\beta$  deposition, toxicity  
513 exerted thereafter by the peptides was insignificant as cells treated as control with only  
514 bromelain peptides showed viability of  $98.26 \pm 3.7\%$ . Under identical conditions, viability of  
515 cells treated with hydrogen peroxide was  $2.16 \pm 1.6\%$ . These results ensured that under  
516 conditions of peptide treatment, toxicity was removed and cells propagated (Fig. 6A).

517 *Microscopic analysis of aggregation and destabilization on cell surface* - PC12 cell topography  
518 as visualized by AFM concealed aggregate-like deposits on cell surface upon incubation with  
519 preformed A $\beta$ 40 monomers (10  $\mu$ M) 72 hr (Fig. 6B(ii)) on contrast to clear surface of naïve  
520 untreated cells (Fig. 6B(i)). The cell morphology also showed a distinct change with irregular  
521 shape, membrane distortions and loss of dendritic growth compared to control cells exhibiting  
522 typical elongated structure with well-defined dendrites. While cells treated with A $\beta$  and  
523 bromelain peptides simultaneously (Fig. 6B(iii)) showed regular shape and dendritic processes,  
524 those treated with bromelain peptides after A $\beta$  deposition (Fig. 6B(iv)) was indicative of gradual  
525 recovery from stressed conditions illustrating smaller dendritic processes. Therefore,  
526 destabilization of preformed fibrils and inhibition of deposition by synthetic peptides was  
527 specific.

## 528 **Animal Studies**

529 Animals infused with A $\beta$  stereotaxically underwent gradual, significant loss in body weight with  
530 time (up to 185 - 220 g), whereas control rats that received only aCSF and those that received an  
531 infusion of A $\beta$  along with bromelain together maintained normal gain in body weight (280 – 330  
532 g) during the same time. A similar observation was also noticed for rats that received bromelain  
533 peptides after 21 days post A $\beta$  infusion that initially lost weight but with treatment of bromelain  
534 peptides over a span of 14 days regained weight to a range of 250 - 300 g, in contrast to those  
535 treated with A $\beta$  and bromelain peptides simultaneously that did not show any significant change.

536 Noticed behavioral changes included decrease in water and food consumption in rats under  
537 stress conditions of A $\beta$  treatment only. Behavioral changes showing decreased activity and  
538 gradual change of body mass were supported with histological images obtained from H & E  
539 staining of brain tissues of corresponding rats. Sham-controlled rats and those that received aCSF  
540 infusion showed clear cortical region with homogeneously spaced brain lobes (Fig. 6C(i)), while  
541 those infused with A $\beta$  exhibited a spongy appearance, brain necrosis, marked presence of plaque  
542 formation in cortical areas of brain and also exhibited cerebral lobes that were much more spaced  
543 with increased intraventricular area. Some of the nuclei showed a ring appearance (Fig. 6C(ii)).  
544 Brain samples of both, rats infused with A $\beta$  and bromelain peptides simultaneously from day 0  
545 (Fig. 6C(iii)) and AD infused rats treated with bromelain peptides after 21 days (Fig. 6C(iv))  
546 gave images having an improvement in histopathological changes compared to that of AD  
547 control but similar to control rat brains (Fig. 6C).

## 548 **DISCUSSION**

549 In a series of studies, we demonstrated that amyloid aggregates of A $\beta$  peptide and insulin [33]  
550 could be destabilized by fruit bromelain peptides. In these sets, synthetic peptides derived using  
551 template of proteins was independently capable of destabilizing amyloid aggregates. Specificity  
552 of these peptides was evident when similar peptides showed inefficiency in performing the same.  
553 A common feature in these combinations is that, presence of intact and functional protein or  
554 enzyme was not essential to cause destabilization. Proteolytically degraded enzymes and/or even  
555 fragments of intact molecules were also capable of disrupting fibrillar structures. This clearly  
556 showed that proteolysis was not involved in the dissociation process. Observations further  
557 reinforced that fibrillar structures never produced fragments below the Mw of monomeric A $\beta$   
558 peptide or insulin [33]. This was confirmed from mass spectrometric analysis.

559 Success of these *in vitro* experiments does not qualify these peptides causing  
560 defibrilization – no matter whether in a pool or purified or synthetic, to act in brain cortex where  
561 A $\beta$  fibrils are formed. Major concern is whether they can cross the BBB [34]. Several criteria of  
562 the peptides need to be fulfilled to cross BBB viz., hydrophobicity, low molecular weight, high  
563 degree of lipid solubility, charge residues of peptides etc [25] of which Mw is a fundamental  
564 criterion. Under physiological conditions, peptides of Mw more than 400 - 600 Da are generally  
565 excluded by BBB [35]. Though this stringency is not strictly maintained in case of AD patients  
566 where compactness of brain cells is affected allowing relatively bigger molecules to enter, in this

567 study, peptides of Mw <500 Da were separated from undigested and large peptides of fruit  
568 bromelain after extensive protease digestion followed by gel filtration and their Mws were  
569 verified from MS analysis (Fig. 1D). Based on Clustal W alignment and ExPasy software  
570 (Peptide Cutter, using peptides pepsin, trypsin, chymotrypsin, carboxypeptidase and elastase),  
571 two peptides TIIGY and GQD were synthesized. Their Mws were 565.67 and 318.29 Da and  
572 hydrophobicities were 6.6 and -7.4 respectively [36]. The hydrophilic peptide was included  
573 because of its uncertainty of functioning with respect to BBB under diseased conditions. These  
574 peptides not only destabilized A $\beta$  fibrils *in vitro* but also protected PC12 cells against death from  
575 assault of A $\beta$  sedimentation (Fig. 6A). These *in vitro* and *ex-vivo* information were essential to  
576 initiate animal model experiments (Fig 6B & 6C).

577 Since pineapple is a widely consumed fruit, efficacy of peptides produced from fruit  
578 bromelain after human digestive conditions were verified in rat model. This is strong evidence  
579 that if peptides get access to A $\beta$  fibrils in brain, probably they could dissociate the deposits. In  
580 this regard, an experiment demonstrating passage of these peptides through artificial brain cell  
581 barrier is welcome. Such experiments are performed with synthetic peptides tagged with a small  
582 amount of a positron-emitting radioactive atom so that Mw of peptide is not affected and the  $\gamma$   
583 radiation is then measured as a function of tissue depth. Computer software is employed to create  
584 a three-dimensional image of the distribution of the substance in brain and other tissues [37].

585 An important outcome of this study is that the selected pool of bromelain peptides not  
586 only irreversibly dissociates preformed A $\beta$  fibrils (Fig. 3), but also inhibits formation of A $\beta$   
587 fibrils from monomeric and oligomeric states. This can be achieved in two ways; first, bromelain  
588 peptides may bind with monomeric A $\beta$  peptide presumably protecting the hydrophobic site/s of  
589 interaction leading to prevention of aggregation or second, upon binding with bromelain  
590 peptides, A $\beta$  peptide undergoes an irreversible conformation change whereby potency of self-  
591 association is lost. It is now well established that the following equilibration exists during the  
592 process or even after fibril formation [38]:

593 
$$\text{Monomer} \rightleftharpoons \text{oligomer} \rightleftharpoons \text{protofibrillar state} \rightleftharpoons \text{fibrillar structure}$$

594 There are evidences from immunological studies using antibodies specific to monomeric  
595 or oligomeric A $\beta$  peptides that even after fibril formation, monomers and oligomers do exist in  
596 equilibrium [39]. Certainly the equilibrium shifts to the right (towards fibril formation) when  
597 stable fibrillar structures are formed while remains in the middle during onset of aggregation.

598 Fibrillar structures being very stable, it is difficult to conceive that bromelain peptides directly  
599 interact with them and make them unstable. On the other hand, bromelain peptides irreversibly  
600 inhibit formation of fibrillar structures from monomeric A $\beta$  peptide indicating positive  
601 interaction leading to conformation change. This is demonstrated indirectly from interaction with  
602 the fluorophore ANS (Fig. 4A-4B) and directly from CD and FT-IR spectra (Fig. 4C-4F).

603 An intriguing part of these studies is that often requirement of inhibitor peptides is sub-  
604 stoichiometric with respect to A $\beta$  peptides. Though it is not possible to predict molecularity of an  
605 aggregate or a mixture of oligomers or peptides in a pool, concentrations of A $\beta$  monomer and  
606 synthetic peptides could be accurately determined. From this information, it can be predicted that  
607 formation of a stable [A $\beta$  monomer-synthetic peptide] binary complex of 1:1 stoichiometry  
608 leading to inhibition of aggregate formation is not possible. The event most pertinent to this  
609 situation is synthetic or bromelain derived peptides bind with A $\beta$  monomer causing irreversible  
610 conformation change. As a result, after dissociation of the binary complex, A $\beta$  peptides  
611 permanently lose their ability to form oligomers and fibrillar structures. The inhibitor peptide in  
612 its free state after dissociation from the complex recycles the reaction. This is similar to enzyme  
613 turnover.

614 A large number of medicinal properties have been attributed to fruit 'bromelain'-the  
615 fresh fruit extract of pineapple. Though cysteine protease bromelain is the major constituent of  
616 the extract, other accompanying components are peroxidases, acid phosphatases, glycosidases,  
617 ribonucleases, cellulases, glycoproteins, carbohydrates, protease inhibitors together with organic  
618 and inorganic compounds. It is believed that a wide array of medicinal properties reside in this  
619 battery of enzymes [14]. Pineapple is a seasonal crop. The fruit is consumed more as a processed  
620 product rather than in its raw form. We have reported earlier that due to harsh sterilization  
621 conditions, these products are completely devoid of enzymatic activities as the enzymes are  
622 either thermally denatured or proteolytically degraded [11]. Since peptides formed after  
623 extensive degradation of 'bromelain' enzymes can destabilize fibrillar structures as reported in  
624 this study, processed pineapple should be capable of performing similar functions. The statement  
625 of Greek physician and philosopher, Hippocrates, 'let food be thy medicine and medicine be thy  
626 food', appears meaningful.

627

628

629 **CONCLUSION**

630 Peptides generated from fruit bromelain under human digestive conditions can inhibit aggregate  
631 formation from monomeric state of amyloidogenic peptides A $\beta$ 40/42 besides facilitating  
632 destabilisation of preformed amyloid fibrils *in vitro*. *Ex vivo* studies using PC12 neuronal cells  
633 and *in vivo* studies using animal models suggested reversal of neurotoxicity caused by amyloid  
634 peptides in presence of bromelain derived peptides. Probable underlying mechanism has been  
635 proposed. Since pineapple is edible, one can initiate clinical trials to determine preventive effects  
636 of neuronal toxicities in AD patients, elderly individuals and in subjects with mild cognitive  
637 impairment using fruit peptides.

638 **ACKNOWLEDGEMENTS**

639 This research was partially supported by CSIR Network Project (mIND BSC 0115). Das S. was  
640 supported from the same source. Dutta S was funded by UGC-SRF and RKP was supported by  
641 CSIR. We thank Dr. Krishnananda Chattopadhyay and Dr. Sandhya Rekha Dungdung of CSIR-  
642 IICB for providing their DLS and cell culture facility respectively. Special thanks to Mr.  
643 T.Muruganandan, Mr. Sailen De, Mr. Jishu Mondal, Mr. Satyabrata Samaddar, Mr, Sandip  
644 Chakraborty and Mr. Diptendu Bhattacharya are due for their technical support in AFM, TEM,  
645 CD, FT-IR, MALDI and ESI-MS facilities respectively.

646 **AUTHOR CONTRIBUTIONS**

647 Conceptualization, S.Das, S.Dutta, R.K.P, S.C.B, U.C.H. and D.B.; Investigation, S.Das,  
648 S.Dutta. and R.K.P; Data Analysis, S.Das, S.Dutta. and R.K.P.; Writing, S.Das., S. Dutta. and  
649 D.B.; Funding Acquisition, Resources, and Supervision, S.C.B., U.C.H and D.B.

650 **DECLARATION OF INTERESTS**

651 The authors declare that there is no conflict of interest among themselves.

652 **DATA SHARING AND DATA ACCESSIBILITY**

653 The data that support the findings of this study are available from the corresponding author upon  
654 reasonable request.

655

656 **REFERENCES**

- 657 [1] F. M. LaFerla, K. N. Green, S. Oddo, *Nat Rev Neurosci* 2007, 8, 499–509.
- 658 [2] J. Hardy, *Science* 2002, 297, 353–356.
- 659 [3] F. Esch, P. Keim, E. Beattie, R. Blacher, A. Culwell, T. Oltersdorf, D. McClure, P. Ward,  
660 *Science* 1990, 248, 1122–1124.
- 661 [4] C. Haass, M. G. Schlossmacher, A. Y. Hung, C. Vigo-Pelfrey, A. Mellon, B. L.  
662 Ostaszewski, I. Lieberburg, E. H. Koo, D. Schenk, D. B. Teplow, et al., *Nature* 1992, 359,  
663 322–325.
- 664 [5] B. Caughey, P. T. Lansbury, *Annu. Rev. Neurosci.* 2003, 26, 267–298.
- 665 [6] D. M. Walsh, I. Klyubin, J. V. Fadeeva, W. K. Cullen, R. Anwyl, M. S. Wolfe, M. J.  
666 Rowan, D. J. Selkoe, *Nature* 2002, 416, 535–539.
- 667 [7] P. N. Lacor, *Journal of Neuroscience* 2004, 24, 10191–10200.
- 668 [8] O. van de Rest, A. A. Berendsen, A. Haveman-Nies, L. C. de Groot, *Advances in Nutrition*  
669 2015, 6, 154–168.
- 670 [9] R. Venkatesan, E. Ji, S. Y. Kim, *BioMed Research International* 2015, 2015, 1–22.
- 671 [10] H. R. Maurer, *CMLS, Cell. Mol. Life Sci.* 2001, 58, 1234–1245.
- 672 [11] S. Das, D. Bhattacharyya, in *In Tropical Fruits: From Cultivation to Consumption and*  
673 *Health Benefits, Pineapple* (Eds.: C.S. Bogsan, S.D. Todorov), Nova Science Publishers, New  
674 York, 2017, pp. 43–100.
- 675 [12] S. Barghorn, V. Nimmrich, A. Striebinger, C. Krantz, P. Keller, B. Janson, M. Bahr, M.  
676 Schmidt, R. S. Bitner, J. Harlan, et al., *J Neurochem* 2005, 95, 834–847.
- 677 [13] G. Sarath, R. Motte, F. Wagner, in *Proteolytic Enzymes: A Practical Approach* (Eds.: R.J.  
678 Beynon, J.S. Bond), IRL Press At Oxford University Press, Oxford; New York, 1996, pp.  
679 25–55.
- 680 [14] T. Murachi, in *Methods in Enzymology*, Elsevier, 1976, pp. 475–485.
- 681 [15] B. López-García, M. Hernández, B. S. Segundo, *Letters in Applied Microbiology* 2012,  
682 55, 62–67.
- 683 [16] P. Muñoz-Ruiz, L. Rubio, E. García-Palomero, I. Dorronsoro, M. del Monte-Millán, R.  
684 Valenzuela, P. Usán, C. de Austria, M. Bartolini, V. Andrisano, et al., *J. Med. Chem.* 2005, 48,  
685 7223–7233.

- 686 [17] B. J. H. Kuipers, H. Gruppen, *J. Agric. Food Chem.* 2007, 55, 5445–5451.
- 687 [18] M. R. Nichols, M. A. Moss, D. K. Reed, W.-L. Lin, R. Mukhopadhyay, J. H. Hoh, T. L.  
688 Rosenberry, *Biochemistry* 2002, 41, 6115–6127.
- 689 [19] H. B. Bohidar, *Colloid & Polymer Sci* 1989, 267, 292–300.
- 690 [20] F. Yang, G. P. Lim, A. N. Begum, O. J. Ubeda, M. R. Simmons, S. S. Ambegaokar, P. P.  
691 Chen, R. Kayed, C. G. Glabe, S. A. Frautschy, et al., *J. Biol. Chem.* 2005, 280, 5892–5901.
- 692 [21] S. F. Santos, D. Zanette, H. Fischer, R. Itri, *Journal of Colloid and Interface Science* 2003,  
693 262, 400–408.
- 694 [22] M. Manczak, P. Mao, M. J. Calkins, A. Cornea, A. P. Reddy, M. P. Murphy, H. H. Szeto,  
695 B. Park, P. H. Reddy, *JAD* 2010, 20, S609–S631.
- 696 [23] R. Paidi, D. Nthenge-Ngumbau, R. Singh, T. Kankanala, H. Mehta, K. Mohanakumar,  
697 *CAR* 2015, 12, 785–795.
- 698 [24] G. Paxinis, C. Watson, 1998.
- 699 [25] W. A. Banks, *BMC Neurol* 2009, 9, S3.
- 700 [26] J. F. Poduslo, G. L. Curran, A. Kumar, B. Frangione, C. Soto, *J. Neurobiol.* 1999, 39,  
701 371–382.
- 702 [27] N. G. Sgourakis, Y. Yan, S. A. McCallum, C. Wang, A. E. Garcia, *Journal of Molecular*  
703 *Biology* 2007, 368, 1448–1457.
- 704 [28] S. Li, X. Su, W. Chen, L. Xiang, *J. Opt. Soc. Am. A* 2009, 26, 1195.
- 705 [29] S. Sukumaran, *J Mol Biol* 2017, 368, 1448–1457.
- 706 [30] A. K. Paravastu, R. D. Leapman, W.-M. Yau, R. Tycko, *Proceedings of the National*  
707 *Academy of Sciences* 2008, 105, 18349–18354.
- 708 [31] I. W. Hamley, *Chem. Rev.* 2012, 112, 5147–5192.
- 709 [32] R. Scherzer-Attali, R. Pellarin, M. Convertino, A. Frydman-Marom, N. Egoz-Matia, S.  
710 Peled, M. Levy-Sakin, D. E. Shalev, A. Caflich, E. Gazit, et al., *PLoS ONE* 2010, 5, e11101.
- 711 [33] S. Das, D. Bhattacharyya, *J. Cell. Biochem.* 2017, 118, 4881–4896.
- 712 [34] A. D. Wong, M. Ye, A. F. Levy, J. D. Rothstein, D. E. Bergles, P. C. Searson, *Front.*  
713 *Neuroeng.* 2013, 6, DOI 10.3389/fneng.2013.00007.



714 [35] C. A. Lipinski, F. Lombardo, B. W. Dominy, P. J. Feeney, *Advanced Drug Delivery*  
715 *Reviews* 2001, 46, 3–26.

716 [36] J. Kyte, R. F. Doolittle, *Journal of Molecular Biology* 1982, 157, 105–132.

717 [37] C. D. Kuhnline Sloan, P. Nandi, T. H. Linz, J. V. Aldrich, K. L. Audus, S. M. Lunte,  
718 *Annual Rev. Anal. Chem.* 2012, 5, 505–531.

719 [38] S. Nag, B. Sarkar, A. Bandyopadhyay, B. Sahoo, V. K. A. Sreenivasan, M. Kombrabail,  
720 C. Muralidharan, S. Maiti, *J. Biol. Chem.* 2011, 286, 13827–13833.

721 [39] L. Hong, C. F. Lee, Y. J. Huang, in *World Scientific Lecture and Course Notes in*  
722 *Chemistry*, World Scientific, 2017, pp. 113–186.

723

## 724 **FIGURE LEGENDS**

### 725 **FIGURE LEGENDS**

726 **Fig. 1: Destabilization of preformed A $\beta$ 40 aggregates and ESI mass analysis of different**  
727 **fractions of peptides.** (A) Dependency of destabilization of A $\beta$  40 aggregates on concentration  
728 of peptides. Residual structure was measured by Thioflavin-T assay. (B) AFM image of the  
729 preformed A $\beta$ 40 aggregate of 72 hr (upper panel) and the disaggregated state (lower panel).  
730 (C) Corresponding TEM images have been shown in (upper panel) and (lower panel).  
731 Experimental conditions have been described in the text. (D) Fruit bromelain was treated with  
732 digestive enzymes and the peptide pool was separated using Sephadex G-10 size exclusion  
733 column. The peak fractions corresponding to retention times ( $R_t$ ) 5.186, 7.172, 8.192 and 9.790  
734 min were analyzed by ESI-MS (i-iv). Being in the desalting zone, the last chromatographic  
735 fraction of  $R_t = 12.185$  min was not analyzed. The HPLC profile has been shown in Inset  
736 (D(i)). See also Fig. S1.

737 **Fig. 2: Destabilization of A $\beta$ 40 aggregate and analysis of hydrodynamic radius of different**  
738 **forms of A $\beta$ 40.** Dependency of disaggregation on (A) the concentration of pool of digested  
739 peptides (1-40  $\mu$ M) in 48 hr and (B) time using 7  $\mu$ M of the peptide pool as measured by Th-T  
740 fluoremetric analysis. (C) DLS measurements of (i) Monomeric A $\beta$ 40, (ii) A $\beta$ 40 fibrils and (iii)  
741 preformed A $\beta$ 40 aggregates after incubation in the presence of fruit bromelain peptides after 48  
742 hr of incubation at 37°C.

743 **Fig. 3: Aggregation kinetics of A $\beta$ 40/42 fibrils.** (A) Monomer to aggregate: A $\beta$ 40 was  
744 incubated in absence (left panel) and presence (right panel) of 7  $\mu$ M digested peptide at 37°C.  
745 (B) Oligomer to aggregate: Oligomers were generated after incubating A $\beta$ 40 for 20 hr under  
746 fibrillating conditions were incubated under similar conditions as in A. Aliquots were withdrawn  
747 at time intervals as indicated vertically. Corresponding Th graphs of A and B have been depicted  
748 in C and D respectively. In both panels, emission intensity of the sets at 96 hr was considered as  
749 100% (See also Fig. S2). (E) TEM images: (Upper panel) A $\beta$ 40 incubated under defined  
750 conditions of fibrillation for 96 hr and 7 days. (Lower panel) Corresponding sets after incubation  
751 with peptide pool for 7 days. (F) Th T assay of the four samples presented in E where absence  
752 and presence of the peptides have been denoted as control and treated. Intensity of the control  
753 sample after 7 days has been considered as 100%. (G) Estimation of concentration of peptide  
754 pool as measured from Th T assay during disaggregation. Fluorescence from spontaneously  
755 formed aggregates after 7 day was considered as 100%. (H) TEM images of (i) monomeric  
756 A $\beta$ 42, (ii) monomeric A $\beta$ 42 fibrillation for 96 hr at 37°C; (iii) fibrillation as seen in presence of  
757 peptide pool for 48 hr and (iv) protease digested peptide pool, inhibiting A $\beta$ 42 aggregation.

758 **Fig. 4: Spectroscopic analysis of different forms of A $\beta$ 40.** (A) Concentration dependency of  
759 ANS interaction as observed from fluorescence emission intensities. (B) Interaction of ANS (500  
760  $\mu$ M) as followed with different species of A $\beta$  during the time course of aggregation. (C) FT-IR  
761 spectra ranging from 1800-1600  $\text{cm}^{-1}$  for different species of A $\beta$ . (D) Change of secondary  
762 structure of A $\beta$ 40 during fibrilization was followed at 1695  $\text{cm}^{-1}$  and 1654  $\text{cm}^{-1}$ . (E) Far UV CD  
763 spectra (195–250 nm) of these states and (F) Time course of aggregate formation from  
764 monomeric state as observed from ellipticity values at 218 nm. Each spectral value is the average  
765 of 5 runs and in all sets, buffer corrections have been done. The descriptions of the notations  
766 have been provided in respective insets. All experimental conditions have been mentioned in  
767 details in the text.

768 **Fig. 5: Determination of small peptides corresponding to A $\beta$**  (A) Sequence alignment of  
769 fruit bromelain with A $\beta$ 40/42 using ClustalW2 software. The aggregation prone region of  
770 A $\beta$ 40/42 (KLVFFAE, residues 16-22) has been highlighted to denote the corresponding region  
771 in fruit bromelain. Two peptides (TIIGY and GQD) corresponding to the highlighted region of  
772 fruit bromelain were considered for further studies. The symbols ‘\*’, ‘:’ and ‘.’ indicate

773 identical, highly similar and similar residues respectively. (B) AFM images of preformed A $\beta$ 40  
774 fibrillar structure (upper panel) and as obtained after incubation for 96 hr with the synthetic  
775 peptides TIIGY (lower left panel) and GQD (lower right panel).

776 **Fig. 6: Ex-vivo and in-vivo toxicity studies of A $\beta$ 40** (A): Inhibition of A $\beta$ 40 induced  
777 cytotoxicity by bromelain derived peptides on PC12 cells as observed from MTT assay.  
778 Viability of cells has been presented with respect to untreated cells as 100%. All results have  
779 been presented after blank corrections where no cell was added. Added reagents have been  
780 mentioned in the inset. (B) AFM images of PC12 cells, (i) untreated cells, (ii) cells after 48 hr  
781 of A $\beta$ 40 treatment. (iii) cells as of (ii) after an additional incubation of 48 hr with bromelain  
782 derived peptides and (iv) cells were treated with A $\beta$ 40 and peptides. (C) Histological H & E  
783 stained section of rat brain tissue obtained from stereotaxic experiments of (i) untreated  
784 (control) (ii) A $\beta$  treated; (iii) A $\beta$  treated rats infused with bromelain peptides after aggregation  
785 was standardized and (iv) rats treated simultaneously with A $\beta$  and bromelain derived peptides.

## 786 SUPPLEMENTAL INFORMATION

### 787 Supplemental Figures

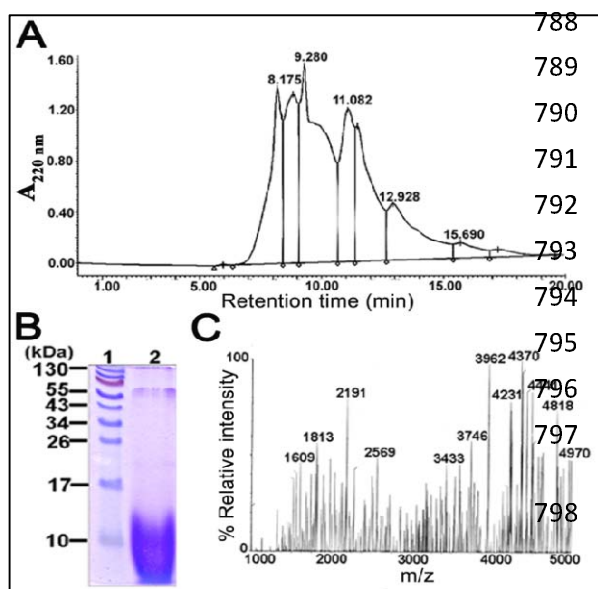

**Fig. S1: Purification and mass analysis of bromelain peptide pool.** (A) SE-HPLC of fruit bromelain derived peptide pool using a Waters Protein Pak 60 column equilibrated with 10 mM Na-P buffer (pH 7.5). Flow rate was 0.8 ml/min and elution was followed at 220 nm. Retention times of major peaks have been indicated. (B) 15 % SDS-PAGE profiles. Lane 1, Protein markers; Lane 2, Peptide pool marked by bar in the chromatogram. (C) MALDI-MS spectrum of SE-HPLC eluted pool of the peptides. Related to Fig. 2.

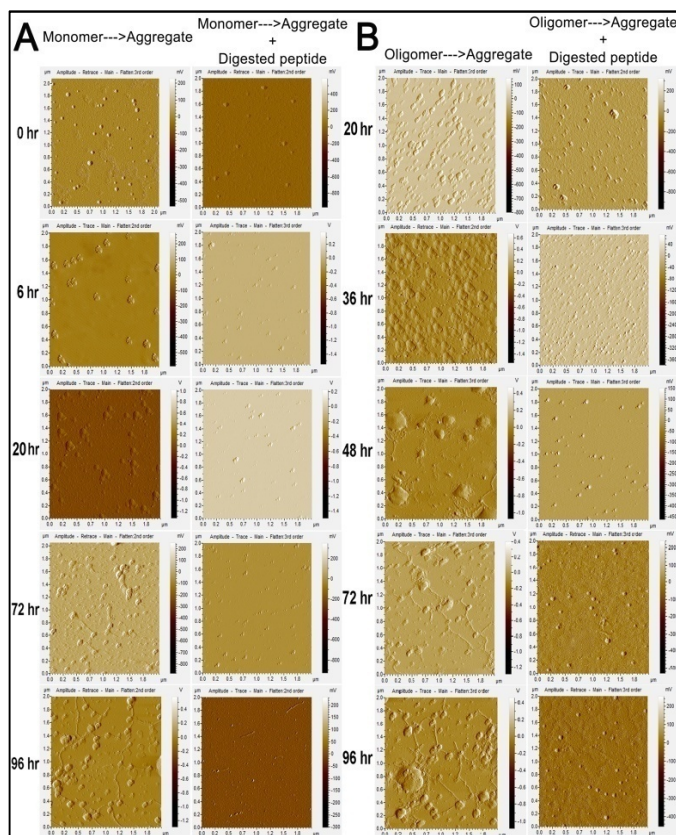

**Fig. S2: Time course of aggregation as followed by AFM micrographs. (A) (Monomers to aggregates): A $\beta$  (1 - 40) co-incubated in the absence or presence of 7  $\mu$ M of digested peptide at 37  $^{\circ}$ C in Na-phosphate buffer (pH 7.5). The aliquots were taken at 0, 12, 24, 72 and 96 hr and analyzed for the presence or absence of aggregates (B) oligomers to aggregates: A $\beta$  40 was incubated for 20 hr under fibrillating conditions and digested peptide was added after 20 hrs of incubation. Aliquots were taken at 20, 36, 48, 72 and 96 hr for analysis of the presence or absence of aggregate. Related to Fig. 3.**

815
